# Supplementary material
Source: MDPI journal article supplement (https://www.mdpi.com/2079-6412/13/12/2067)
Supplement: s1 [file s1 › coatings-2744485-supplementary.pdf]

# Supplementary Materials: Influence of Substrate Preparation on the Catalytic Activity of Conical Ni Catalysts

Katarzyna Skibińska <sup>1,2,\*</sup>, Safya Elsharkawy <sup>1,3</sup>, Anna Kula <sup>1</sup>, Dawid Kutyla <sup>1</sup> and Piotr Żabiński <sup>1</sup>

<sup>1</sup> Faculty of Non-Ferrous-Metals, AGH University of Krakow, al. A. Mickiewicza 30, 30-059 Krakow, Poland; elsharka@agh.edu.pl (S.E.); kula@agh.edu.pl (A.K.); kutyla@agh.edu.pl (D.K.); zabinski@agh.edu.pl (P.Ż.)

<sup>2</sup> CBRT SA Research and Development Center of Technology for Industry, Ludwika Waryńskiego 3A, 00-645 Warszawa, Poland

<sup>3</sup> Chemistry Department, Faculty of Science, Tanta University, Tanta 31527, Egypt

\* Correspondence: kskib@agh.edu.pl

**Citation:** Skibińska, K.; Elsharkawy, S.; Kula, A.; Kutyla, D.; Żabiński, P. Supplementary Materials: Influence of Substrate Preparation on the Catalytic Activity of Conical Ni Catalysts. *Coatings* **2023**, *13*, 2067. <https://doi.org/10.3390/coatings13122067>

Academic Editors: Lahoucine Bahsis, Hafid Anane and Alexander Tolstoguzov

Received: 13 November 2023

Revised: 29 November 2023

Accepted: 8 December 2023

Published: 11 December 2023

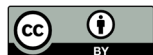

**Copyright:** © 2023 by the authors.

Licensee MDPI, Basel, Switzerland.

This article is an open access article

distributed under the terms and

conditions of the Creative Commons

Attribution (CC BY) license

([https://creativecommons.org/licenses](https://creativecommons.org/licenses/by/4.0/)

/by/4.0/).

**Table S1.** Chemical compositions determined by the EDS technique.

| Sample   | Substrate preparation           | Chemical content [% at.] |     |     |
|----------|---------------------------------|--------------------------|-----|-----|
|          |                                 | Ni                       | O   | Cl  |
| Ni cones | Etched                          | 98.4                     | 1.6 | 0.0 |
|          | Etched and polished (400 grit)  | 96.6                     | 3.3 | 0.1 |
|          | Etched and polished (800 grit)  | 96.3                     | 3.6 | 0.1 |
|          | Etched and polished (1200 grit) | 97.2                     | 2.8 | 0.0 |

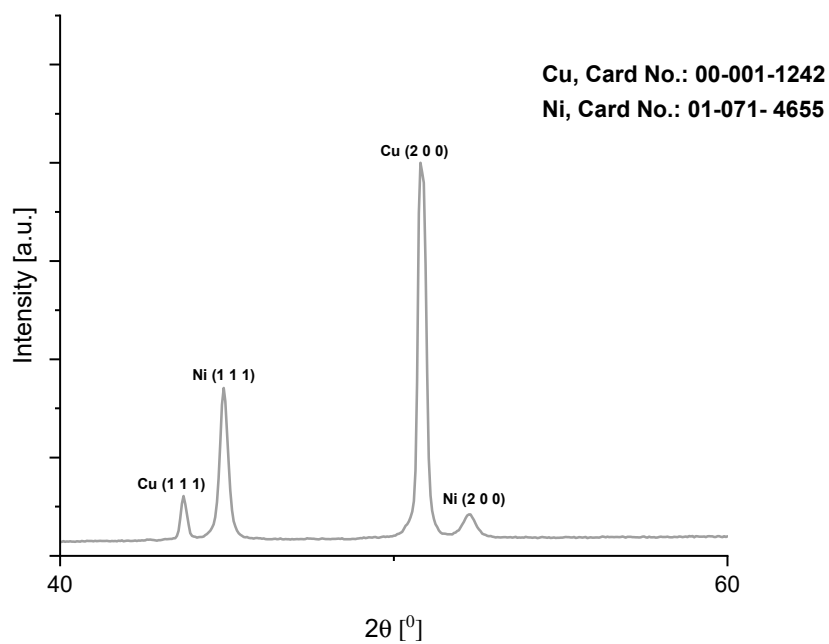

**Figure S1.** XRD diffraction pattern of the conical Ni coating deposited on the etched Cu substrate.

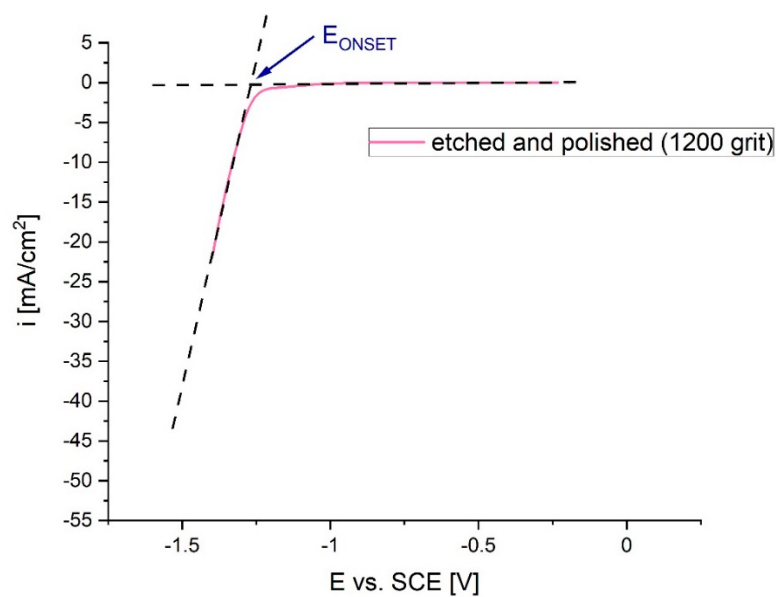

**Figure S2.** Determination of the ONSET potential.
